# Supplementary material for: Utilization of Low Molecular Weight Carbon Sources by Fungi and Saprolegniales: Implications for Their Ecology and Taxonomy
Source: MDPI journal article supplement (doi:10.3390/microorganisms11030782), 2023-03-18
Supplement: s1 [file s1]

## Supporting Information

# Utilization of Low Molecular Weight Carbon Sources by Fungi and *Saprolegniales*: Implications for Their Ecology and Taxonomy

Hossein Masigol <sup>1,2</sup>, Hans-Peter Grossart <sup>1,3,\*</sup>, Seyedeh Roksana Taheri <sup>1</sup>, Reza Mostowfizadeh-Ghalamfarsa <sup>4</sup>, Mohammad Javad Pourmoghaddam <sup>2</sup>, Ali Chenari Bouket <sup>5</sup> and Seyed Akbar Khodaparast <sup>2</sup>

<sup>1</sup> Plankton and Microbial Ecology, Leibniz Institute for Freshwater Ecology and Inland Fisheries (IGB), 16775 Neuglobsow, Germany; hossein.masigol@gmail.com (H.M.); roxi.thi@gmail.com (S.R.T.)

<sup>2</sup> Department of Plant Protection, Faculty of Agricultural Sciences, University of Guilan, Rasht 4199613776, Iran; javad.pormoghaddam@gmail.com (M.J.P.); blumeria2015@gmail.com (S.A.K.)

<sup>3</sup> Institute for Biochemistry and Biology, Potsdam University, 14469 Potsdam, Germany

<sup>4</sup> Department of Plant Protection, School of Agriculture, Shiraz University, Shiraz 7144113131, Iran; rmostofi@shirazu.ac.ir

<sup>5</sup> East Azarbaijan Agricultural and Natural Resources Research and Education Centre, Plant Protection Research Department, Agricultural Research, Education and Extension Organization (AREEO), Tabriz 5355179854, Iran; a.chenari@areeo.ac.ir

\* Correspondence: hgrossart@igb-berlin.de; Tel.: +49-(0)-3308269991

## LIST OF SUPPORTING INFORMATION

|                                                                                                       |   |
|-------------------------------------------------------------------------------------------------------|---|
| <b>Table S1.</b> Isolation and accession numbers of sequences used in the phylogenetic analyses ..... | 3 |
| <b>References to Table S1</b> .....                                                                   | 5 |

| <b>Table S1.</b> Isolation and accession numbers of sequences used in the phylogenetic analyses.<br>Isolates/sequences in bold were isolated/sequenced in present study. N/A: not available. |                 |                          |                 |                                                                 |
|----------------------------------------------------------------------------------------------------------------------------------------------------------------------------------------------|-----------------|--------------------------|-----------------|-----------------------------------------------------------------|
| Species                                                                                                                                                                                      | Strain number   | GenBank accession number |                 | References                                                      |
|                                                                                                                                                                                              |                 | ITS                      | LSU             |                                                                 |
| <i>Achlya ambisexualis</i>                                                                                                                                                                   | CBS38379        | HQ643082                 | N/A             | Robideau et al. (2011)                                          |
| <i>Achlya bisexualis</i>                                                                                                                                                                     | GHL2012.2       | <b>KJ028042</b>          | N/A             | unpublished                                                     |
| <i>Achlya</i> sp.                                                                                                                                                                            | <b>F962-15</b>  | <b>MH394644</b>          | N/A             | <b>This study</b>                                               |
| <i>Achlya</i> sp.                                                                                                                                                                            | <b>O963-13</b>  | <b>MH253591</b>          | N/A             | <b>This study</b>                                               |
| <i>Achlya</i> sp.                                                                                                                                                                            | <b>O962-13</b>  | <b>MH253586</b>          | N/A             | <b>This study</b>                                               |
| <i>Aspergillus aculatus</i>                                                                                                                                                                  | F1P3RSF4        | MK035984                 | N/A             | unpublished                                                     |
| <i>Aspergillus aculatus</i>                                                                                                                                                                  | KKU-CT2         | LC102114                 | N/A             | unpublished                                                     |
| <i>Aspergillus candidus</i>                                                                                                                                                                  | DAOM 216320     | JN942868                 | JN938922        | Schoch et al. (2012)                                            |
| <i>Aspergillus clavatus</i>                                                                                                                                                                  | DAOM 216311     | JN942917                 | JN938924        | Schoch et al. (2012)                                            |
| <i>Aspergillus flavus</i>                                                                                                                                                                    | DAOM 225949     | JN942867                 | JN938926        | Schoch et al. (2012)                                            |
| <i>Aspergillus fumigatus</i>                                                                                                                                                                 | DAOM 215394     | JN942916                 | JN938928        | Schoch et al. (2012)                                            |
| <i>Aspergillus niger</i>                                                                                                                                                                     | DAOM 221143     | JN942866                 | JN938930        | Schoch et al. (2012)                                            |
| <i>Aspergillus parasiticus</i>                                                                                                                                                               | DAOM 225948     | JN942865                 | JN938934        | Schoch et al. (2012)                                            |
| <i>Aspergillus</i> sp.                                                                                                                                                                       | <b>RT16</b>     | <b>MH367066</b>          | N/A             | <b>This study</b>                                               |
| <i>Cladosporium allicinum</i>                                                                                                                                                                | CBS 399.80      | AJ244227                 | DQ678074        | Schoch et al. (2006), de Hoog et al. (1999)                     |
| <i>Cladosporium allicinum</i>                                                                                                                                                                | CPC 5101        | AY251078                 | GU214408        | Braun et al. (2003); Crous et al. (2009)                        |
| <i>Cladosporium cladosporioides</i>                                                                                                                                                          | CBS 126915      | MH864338                 | MH875782        | Vu et al. (2019)                                                |
| <i>Cladosporium cladosporioides</i>                                                                                                                                                          | <b>FBP8</b>     | <b>MN401025</b>          | <b>ON211939</b> | <b>This study</b>                                               |
| <i>Cladosporium cladosporioides</i>                                                                                                                                                          | <b>FBL81</b>    | <b>MN401020</b>          | <b>MN396219</b> | <b>This study</b>                                               |
| <i>Cladosporium herbarum</i>                                                                                                                                                                 | DAOM 196248     | JN942903                 | JN938886        | Schoch et al. (2012)                                            |
| <i>Cladosporium herbarum</i>                                                                                                                                                                 | CBS 723.79      | EU167558                 | GU214410        | Simon and Weiß (2008); Simon et al. (2009); Crous et al. (2009) |
| <i>Dictyuchus monosporus</i>                                                                                                                                                                 | 278B_AH         | KP663638                 | N/A             | unpublished                                                     |
| <i>Dictyuchus pseudodiktyon</i>                                                                                                                                                              | CCIBt 4108      | KT935276                 | N/A             | unpublished                                                     |
| <i>Dictyuchus</i> sp.                                                                                                                                                                        | <b>M963-8A</b>  | <b>MH253582</b>          | N/A             | <b>This study</b>                                               |
| <i>Dictyuchus</i> sp.                                                                                                                                                                        | <b>O962-14</b>  | <b>MH253592</b>          | N/A             | <b>This study</b>                                               |
| <i>Dictyuchus</i> sp.                                                                                                                                                                        | <b>O963-5</b>   | <b>MH253588</b>          | N/A             | <b>This study</b>                                               |
| <i>Dictyuchus</i> sp.                                                                                                                                                                        | <b>O961-3</b>   | <b>MH394640</b>          | N/A             | <b>This study</b>                                               |
| <i>Dictyuchus</i> sp.                                                                                                                                                                        | <b>T963-33B</b> | <b>MH253593</b>          | N/A             | <b>This study</b>                                               |
| <i>Fusarium proliferatum</i>                                                                                                                                                                 | CBS 240.64      | MH858428                 | MH870056        | Vu et al. (2019)                                                |
| <i>Fusarium</i> sp.                                                                                                                                                                          | MRR4            | MN461532                 | N/A             | unpublished                                                     |
| <i>Fusarium</i> sp.                                                                                                                                                                          | brs1            | OM106700                 | N/A             | unpublished                                                     |
| <i>Fusarium</i> sp.                                                                                                                                                                          | -               | MK256324                 | N/A             | unpublished                                                     |
| <i>Fusarium</i> sp.                                                                                                                                                                          | -               | MW369561                 | N/A             | unpublished                                                     |
| <b>Table S1. Cont.</b>                                                                                                                                                                       |                 |                          |                 |                                                                 |

| Species                             | Strain number  | GenBank accession number |          | References              |
|-------------------------------------|----------------|--------------------------|----------|-------------------------|
|                                     |                | ITS                      | LSU      |                         |
| <i>Fusarium</i> sp.                 | RT3            | MH367054                 | N/A      | This study              |
| <i>Fusarium</i> sp.                 | RT18           | MH367068                 | N/A      | This study              |
| <i>Paecilomyces varioti</i>         | NR23           | MH270551                 | N/A      | unpublished             |
| <i>Paecilomyces varioti</i>         | SICAU SDT12    | KJ027987                 | N/A      | unpublished             |
| <i>Paecilomyces</i> sp.             | RT10           | MH367061                 | N/A      | This study              |
| <i>Penicillium brevicompactum</i>   | FBP81          | MN401026                 | MN396223 | This study              |
| <i>Penicillium brevicompactum</i>   | FBP7           | MN401023                 | MN396222 | This study              |
| <i>Penicillium brevicompactum</i>   | FBP5           | MN401017                 | MN396215 | This study              |
| <i>Penicillium crustosum</i>        | CBS 115503     | MH862985                 | NG069876 | Vu et al. (2019)        |
| <i>Penicillium crustosum</i>        | DAOM 215345    | JN942857                 | JN938953 | Schoch et al. (2012)    |
| <i>Penicillium crustosum</i>        | FBSL1          | MN401024                 | ON211940 | This study              |
| <i>Plectosphaerella</i> sp.         | TV26-T-1       | MW765109                 | N/A      | unpublished             |
| <i>Plectosphaerella</i> sp.         | TV14-10-1      | MW765087                 | N/A      | unpublished             |
| <i>Plectosphaerella</i> sp.         | RT5            | MH367056                 | N/A      | This study              |
| <i>Pseudocercospora cruenta</i>     | CPC 10846      | GU269688                 | GU214673 | Crous et al. (2013)     |
| <i>Pseudocercospora fuligena</i>    | CPC 12296      | GU269711                 | GU214675 | Crous et al. (2013)     |
| <i>Pseudocercospora kaki</i>        | MUCC 900       | GU269729                 | GU253761 | Crous et al. (2013)     |
| <i>Pseudocercospora leucadendri</i> | CPC 1869       | GU269842                 | GU214480 | Crous et al. (2013)     |
| <i>Pseudocercospora vitis</i>       | CPC 11595      | GU269829                 | GU214483 | Crous et al. (2013)     |
| <i>Sarocladium kiliense</i>         | KoLRI_EL005555 | MN844617                 | N/A      | unpublished             |
| <i>Sarocladium kiliense</i>         | KoLRI_EL005551 | MN844616                 | N/A      | unpublished             |
| <i>Sarocladium</i> sp.              | RT1            | MH367052                 | N/A      | This study              |
| <i>Volutella citrinella</i>         | -              | HQ897821                 | N/A      | Grafenhan et al. (2011) |
| <i>Volutella citrinella</i>         | CNUFC DYR1     | MW757247                 | N/A      | unpublished             |
| <i>Volutella</i> sp.                | RT4            | MH367055                 | N/A      | This study              |

## References to Table S1

- Braun, U.; Crous, P.W.; Dugan, F.; Groenewald, J.Z.; de Hoog, G.S. Phylogeny and taxonomy of *Cladosporium*-like hyphomycetes, including *Davidiella* gen. nov., the teleomorph of *Cladosporium* s. str. *Mycol. Progress.* **2003**, *2*, 3–18. <https://doi.org/10.1007/s11557-006-0039-2>
- Crous, P.W.; Schoch, C.L.; Hyde, K.D.; Wood, A.R.; Gueidan, C.; de Hoog, G.S.; Groenewald, J.Z. Phylogenetic lineages in the Capnodiales. *Stud. Mycol.* **2009**, *64*, 17–47. <https://doi.org/10.3114/sim.2009.64.02>
- Crous, P.W.; Braun, U.; Hunter, G.C.; Wingfield, M.J.; Verkley, G.J.M.; Shin, H.D.; Nakashima, C.; Groenewald, J.Z. Phylogenetic lineages in *Pseudocercospora*. *Stud. Mycol.* **2013**, *75*, 37–114. <http://dx.doi.org/10.3114/sim0005>
- de Hoog, G.S.; Zalar, P.; Urzì, C.; de Leo, F.; Yurlova, N.A.; Sterflinger, K. Relationships of dothideaceous black yeasts and meristematic fungi based on 5.8S and ITS2 rDNA sequence comparison. *Stud. Mycol.* **1999**, *43*, 31–37.
- Gräfenhan, T.; Schroers, H.-J.; Nirenberg, H.I.; Seifert, K.A. An overview of the taxonomy, phylogeny, and typification of nectriaceous fungi in *Cosmospora*, *Acremonium*, *Fusarium*, *Stilbella*, and *Volutella*. *Stud. Mycol.* **2011**, *68*, 79–113. <https://doi.org/10.3114/sim.2011.68.04>
- Lecellier, A.; Mounier, J.; Gaydou, V.; Castrec, L.; Barbier, G.; Ablain, W.; Manfait, M.; Toubas, D.; Sockalingum, G.D. Differentiation and identification of filamentous fungi by high-throughput FTIR spectroscopic analysis of mycelia. *Int. J. Food. Microbiol.* **2014**, *168–169*, 32–41. <https://doi.org/10.1016/j.ijfoodmicro.2013.10.011>.
- Robideau, G.P.; De Cock, A.W.; Coffey, M.D.; Voglmayr, H.; Brouwer, H.; Bala, K.; Chitty, D.W.; Desaulniers, N.; Eggertson, Q.A.; Gachon, C.M.; HU, C.H. DNA barcoding of oomycetes with cytochrome c oxidase subunit I and internal transcribed spacer. *Molecular ecology resources* **2011**, *11*(6), 1002–1011. <https://doi.org/10.1111/j.1755-0998.2011.03041.x>
- Schoch, C.L.; Shoemaker, R.A.; Seifert, K.A.; Hambleton, S.; Spatafora, J.W.; Crous, P.W. A multigene phylogeny of the Dothideomycetes using four nuclear loci. *Mycologia* **2006**, *98*, 1041–1052. <https://doi.org/10.1080/15572536.2006.11832632>
- Schoch, C.L.; Seifert, K.A.; Huhndorf, S. et al. Nuclear ribosomal internal transcribed spacer (ITS) region as a universal DNA barcode marker for Fungi. *PNAS* **2012**, *109*, 1–6. <https://doi.org/10.1073/pnas.1117018109>
- Simon, U.K.; Weiß, M. Intragenomic Variation of Fungal Ribosomal Genes Is Higher than Previously Thought, *Molecular Biology and Evolution* **2008**, *25*(11), 2251–2254. <https://doi.org/10.1093/molbev/msn188>
- Simon, U.K.; Groenewald, J.Z.; Crous, P.W. *Cymadothea trifolii*, an obligate biotrophic leaf parasite of *Trifolium*, belongs to Mycosphaerellaceae as shown by nuclear ribosomal DNA analyses. *Persoonia* **2009**, *22*, 49–55. [doi:10.3767/003158509X425350](https://doi.org/10.3767/003158509X425350)
- Vu, D.; Groenewald, M.; de Vries, M.; Gehrman, T.; Stielow, B. et al. Large-scale generation and analysis of filamentous fungal DNA barcodes boosts coverage for kingdom fungi and reveals thresholds for fungal species and higher taxon delimitation. *Stud. Mycol.* **2019**, *92*, 135–154. <https://doi.org/10.1016/j.simyco.2018.05.001>
